# Supplementary material
Source: ML conference proceedings conference paper supplement (https://openaccess.thecvf.com/content/CVPR2021/html/Ma_MUST-GAN_Multi-Level_Statistics_CVPR_2021_paper.html)
Supplement: Supplementary file 1 [file Ma_MUST-GAN_Multi-Level_Statistics_CVPR_2021_supplemental.pdf]

## A. Additional Experimental Results

This section demonstrates some additional experimental results to illustrate the superiority of the method proposed in this paper. Figure 1 shows our method’s performance results in the pose transfer task. And Figure 2,3 show the high performance of this paper’s model in the clothes style transfer task, with the two figures showing the style transfer for upper clothes and pants, respectively.

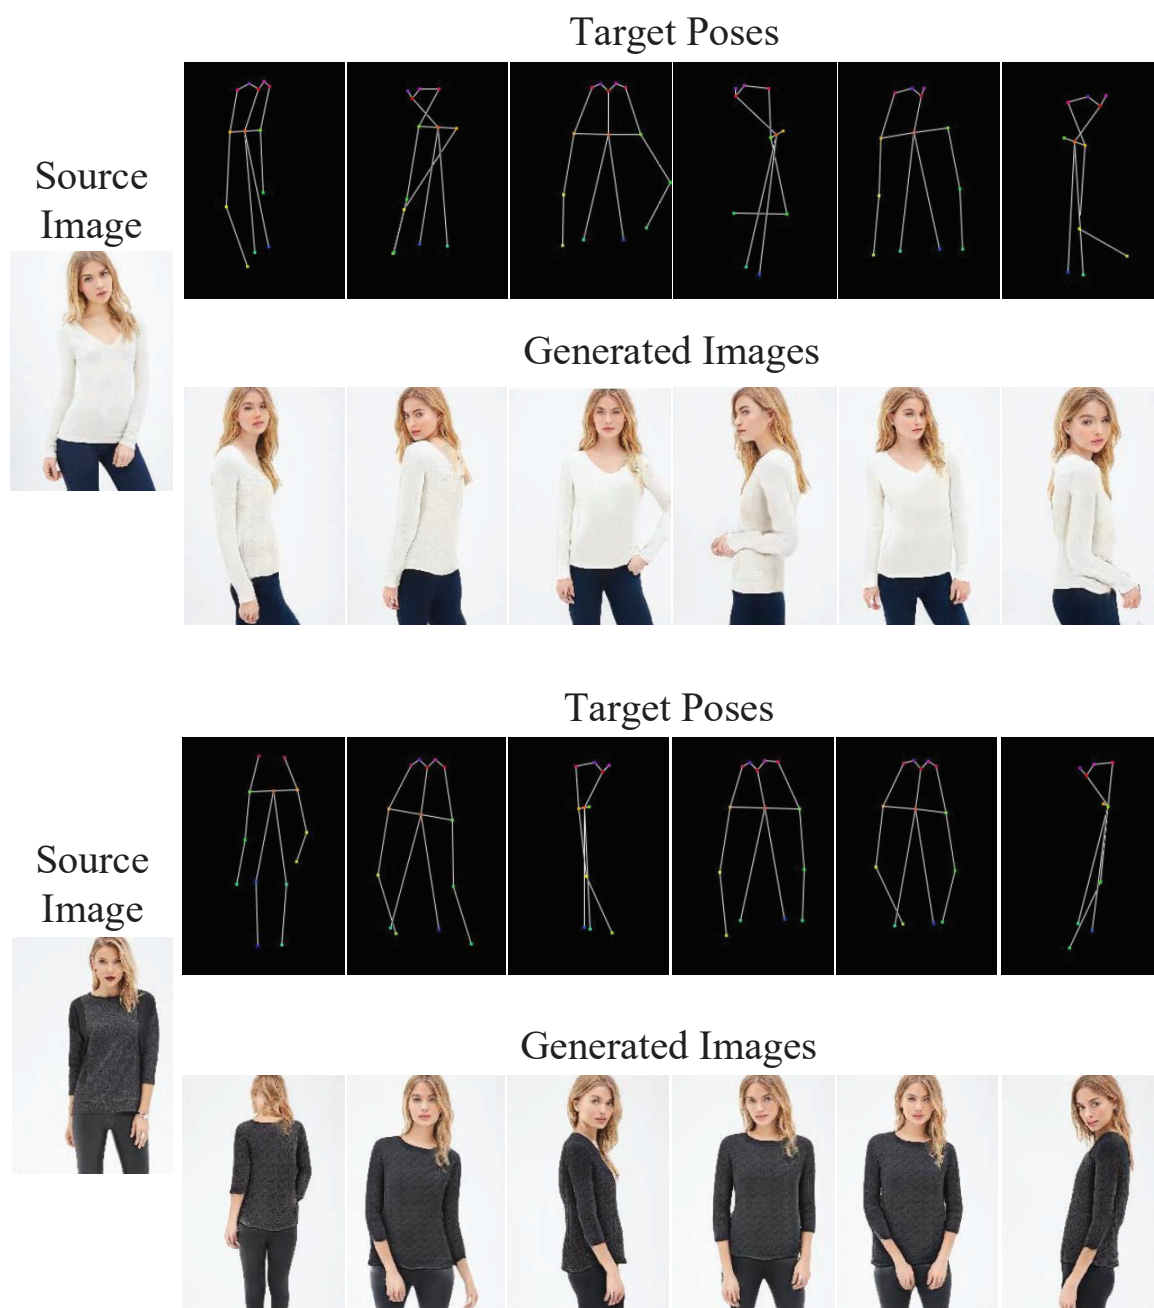

Figure 1. The results of our method in the pose transfer task.

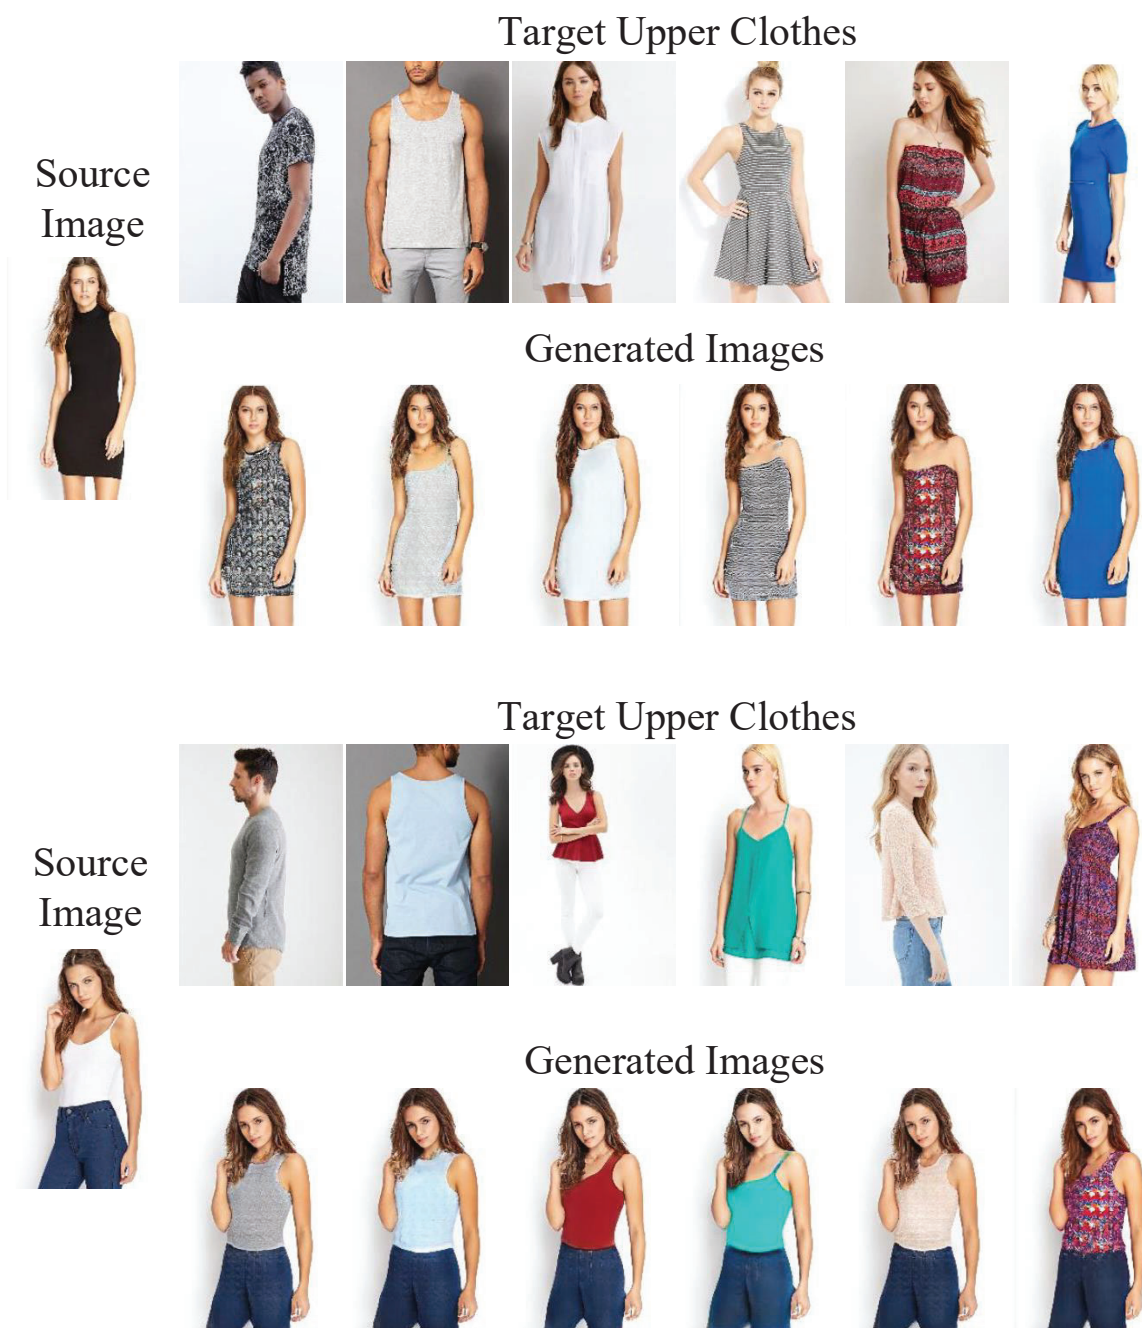

Figure 2. The results of our method in the clothes style transfer task (For upper clothes).

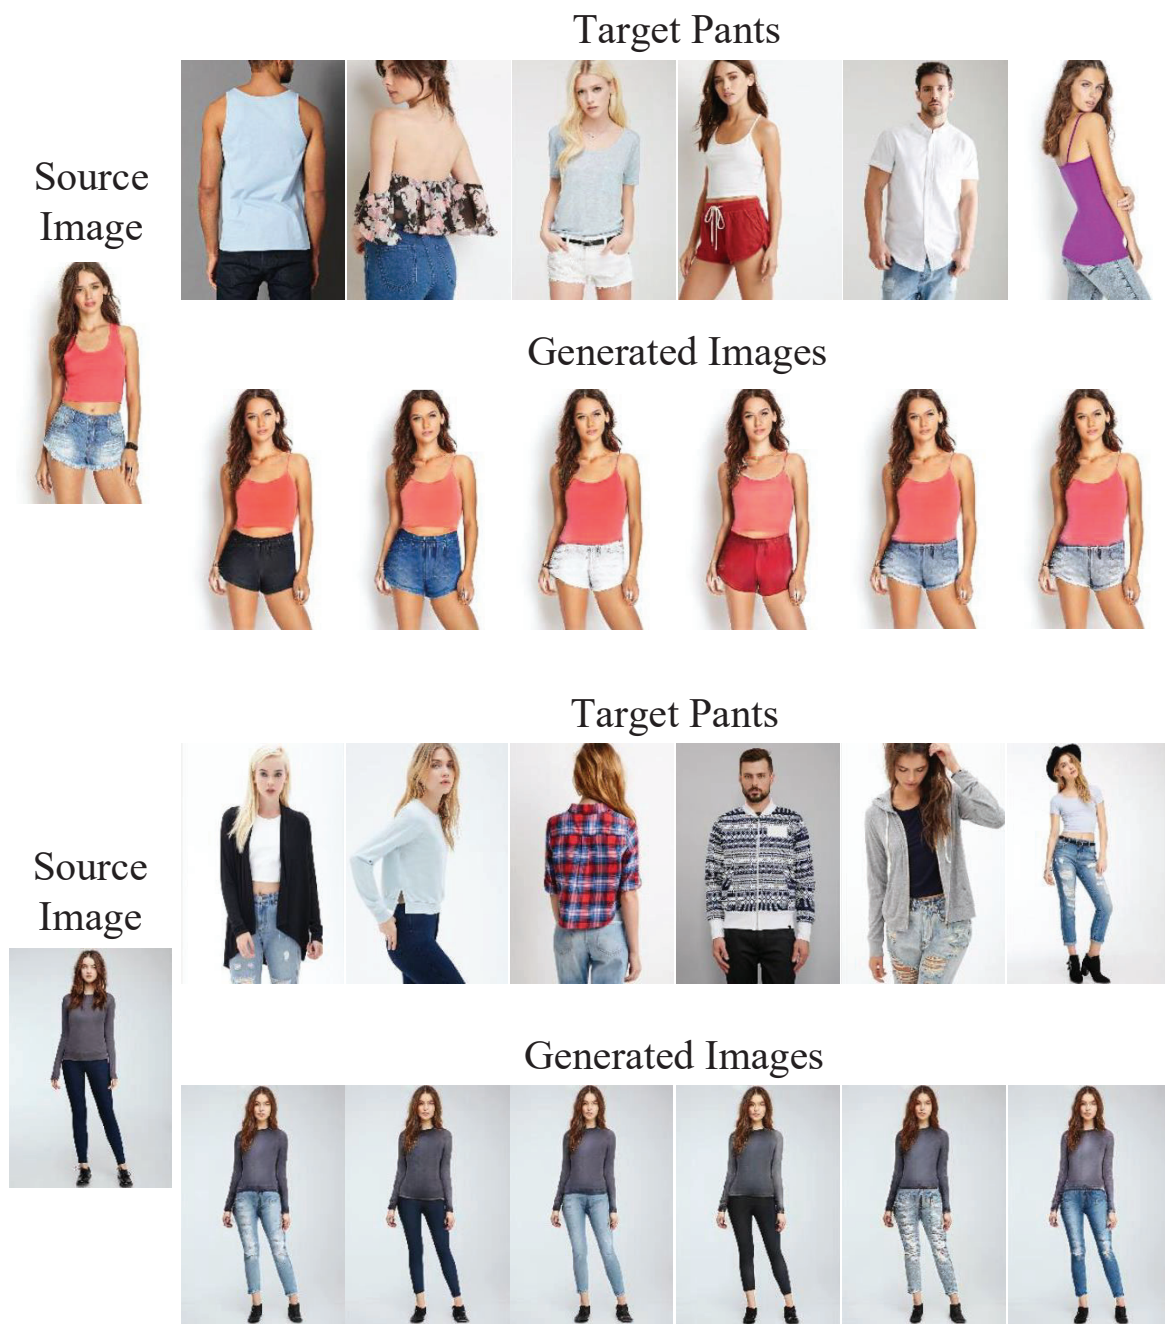

Figure 3. The results of our method in the clothes style transfer task (For pants).
